# Supplementary material for: Comparing Efficacy and Safety of Mechanical Thrombectomy in Vertebrobasilar Tandem Occlusion Versus Isolated Basilar Artery Occlusion Stroke: A Systematic Review and Meta-Analysis
Source: Research Square preprint supplement (doi:10.21203/rs.3.rs-7284761/v1), 2025-10-15
Supplement: Supplementary file 1 [file 13bf6963c20f60b78e31fd4d.docx]

**Supplementary File**

**Index**

**Supplementary Table 1:** Detailed search strategies used in each database

**Supplementary Table 2:** Newcastle Ottawa Scale quality assessment of the non-randomized studies

**Supplementary Figure 1:** Functional independence leave-one-out sensitivity analysis

**Supplementary Figure 2:** Successful recanalization leave-one-out sensitivity analysis

**Supplementary Figure 3:** All-cause mortality leave-one-out sensitivity analysis

**Supplementary Figure 4:** All-cause mortality leave-one-out sensitivity analysis

**Supplementary Figure 5:** Functional Independence funnel plot

**Supplementary Figure 6:** Successful recanalization funnel plot

**Supplementary Figure 7**: Symptomatic intracerebral hemorrhage funnel plot

**Supplementary Figure 8**: All-cause mortality funnel plot

**Supplementary Figure 9:** Functional Independence Egger’s regression test

**Supplementary Figure 10:** Successful recanalization Egger’s regression test

**Supplementary Figure 11**: Symptomatic intracerebral hemorrhage Egger’s regression test

**Supplementary Figure 12**: All-cause mortality Egger’s regression test

| **Supplementary Table 1:** Detailed search strategies used in each database | | |
| --- | --- | --- |
| **Databases** | **Search String** | **Articles Retrieved** |
| PubMed | ("Thrombectomy"[MeSH Terms] OR "Aspiration Thrombectomy"[All Fields] OR "Percutaneous Aspiration Thrombectomy"[All Fields] OR "Mechanical thrombectomy"[All Fields] OR "Endovascular thrombectomy"[All Fields]) AND ("posterior circulation stroke"[All Fields] OR "basilar artery stroke"[All Fields] OR "isolated basilar artery occlusion"[All Fields] OR ("vertebrobasilar"[All Fields] AND ("tandem"[All Fields] OR "tandems"[All Fields]) AND ("dental occlusion"[MeSH Terms] OR ("dental"[All Fields] AND "occlusion"[All Fields]) OR "dental occlusion"[All Fields] OR "occlusion"[All Fields] OR "occlused"[All Fields] OR "occlusions"[All Fields] OR "occlusive"[All Fields] OR "occlusives"[All Fields])) OR "tandem occlusion"[All Fields] OR "tandem occlusion stroke"[All Fields]) | 333 |
| Cochrane Central | ("Thrombectomy" OR "Aspiration Thrombectomy" OR "Percutaneous Aspiration Thrombectomy" OR "Mechanical thrombectomy" OR "Endovascular thrombectomy") AND ( "posterior circulation stroke" OR "basilar artery stroke" OR "isolated basilar artery occlusion" OR "vertebrobasilar tandem occlusion" OR "tandem occlusion" OR "tandem occlusion stroke" ) | 70 |
| Science Direct | ("Thrombectomy" OR "Mechanical thrombectomy" OR "Endovascular thrombectomy") AND ( "posterior circulation stroke" OR "basilar artery stroke" OR "isolated basilar artery occlusion" OR "vertebrobasilar tandem occlusion" OR "tandem occlusion") | 915 |

| **Supplementary Table S2:** Newcastle Ottawa Scale for the quality assessment of the non-randomized studies | | | | | | | | | | |
| --- | --- | --- | --- | --- | --- | --- | --- | --- | --- | --- |
| **Cohort Studies** | | **Selection** | | | | **Comparability** | **Exposure** | | | **Total** |
| ***Author*** | ***Year*** | ***Representativeness of Exposed Cohort*** | ***Selection of the Non exposed cohort*** | ***Ascertainment of Exposure*** | ***Outcome was not Present at the start of Study*** | ***Assessment of Outcome*** | ***Follow-up long enough for Outcomes to occur*** | ***Adequacy of follow-up of Cohorts*** |
| Sun | 2020 | * | * | * |  | ** | * | * |  | 7 |
| Elhorany | 2020 | * | * | * | * | ** | * | * |  | 8 |
| Piechowiak | 2020 | * | * | * |  | ** | * | * | * | 8 |
| Baik | 2019 | * | * | * |  | * | * | * | * | 7 |
| Klail | 2024 | * | * | * | * | ** | * | * | * | 9 |
| Dogan | 2024 | * | * | * | * | ** | * | * | * | 9 |
| Cohen | 2016 | * | * | * | * | * | * |  | * | 7 |
| Xing | 2020 | * | * | * | * | * | * | * | * | 8 |
| Baik | 2020 | * | * | * | * | * | * | * | * | 8 |

**
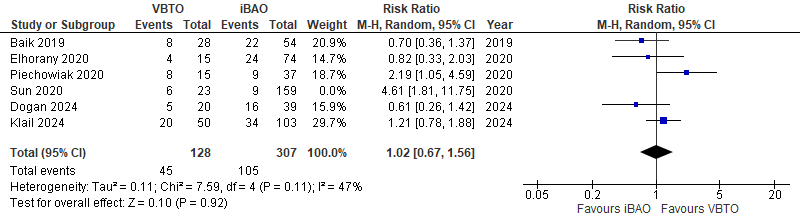
**

**Supplementary Figure 1:** Functional independence leave-one-out sensitivity analysis


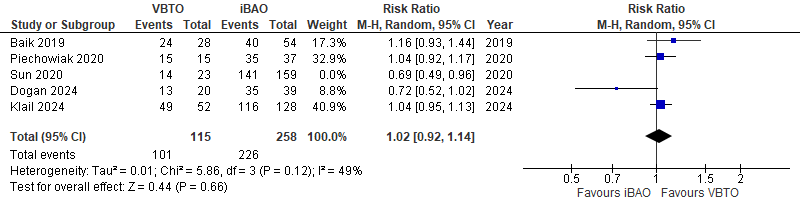


**Supplementary Figure 2:** Successful recanalization leave-one-out sensitivity analysis


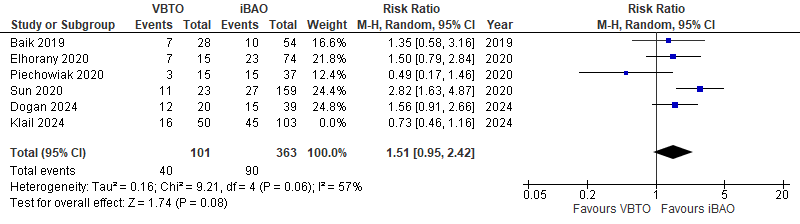


**Supplementary Figure 3:** All-cause mortality leave-one-out sensitivity analysis

**
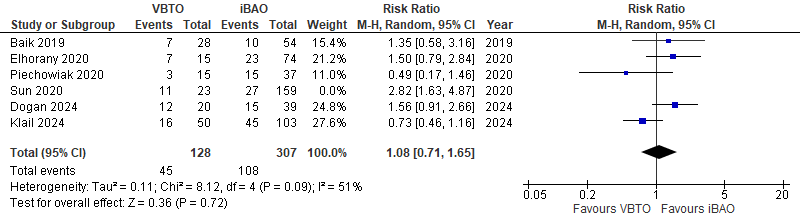
**

**Supplementary Figure 4:** All-cause mortality leave-one-out sensitivity analysis

**
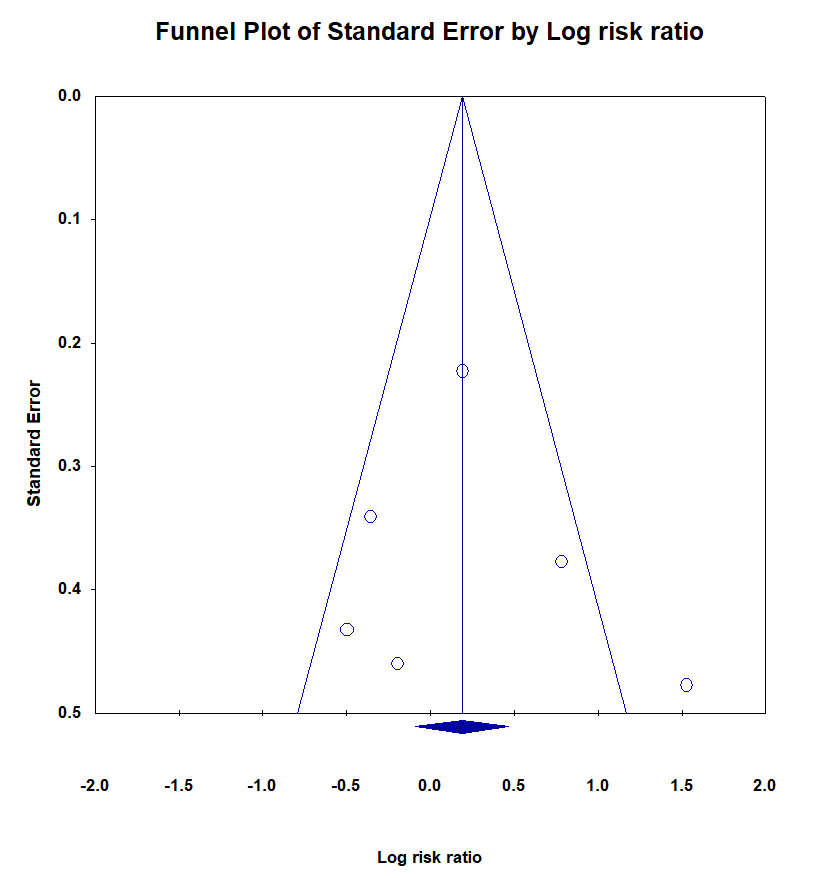
**

**Supplementary Figure 5:** Functional Independence funnel plot

**
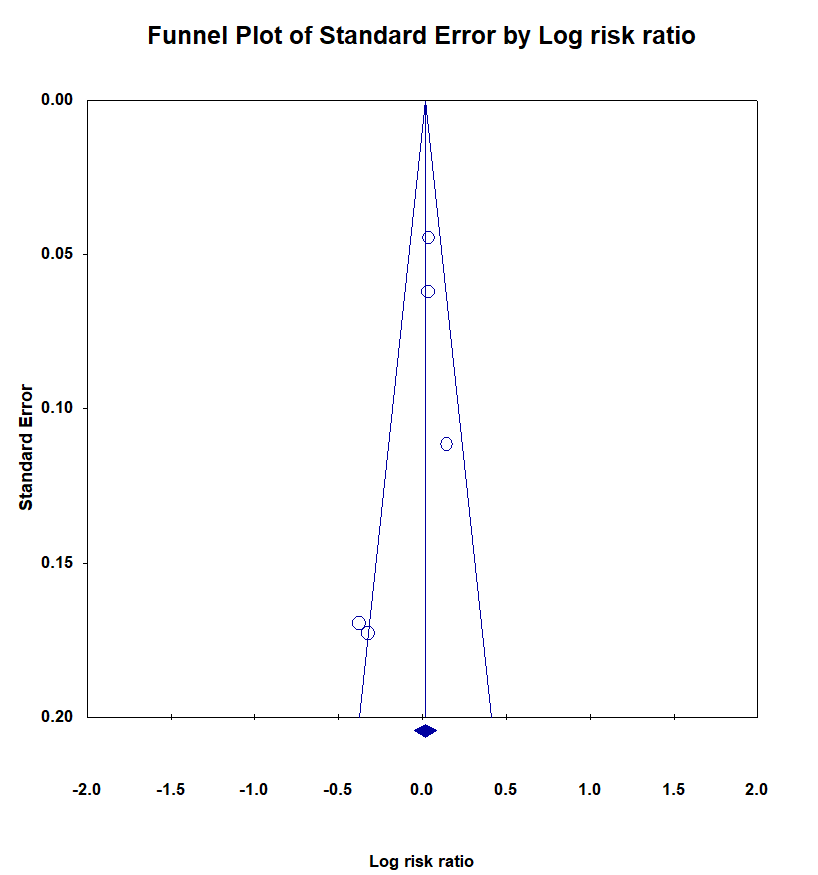
**

**Supplementary Figure 6:** Successful recanalization funnel plot

**
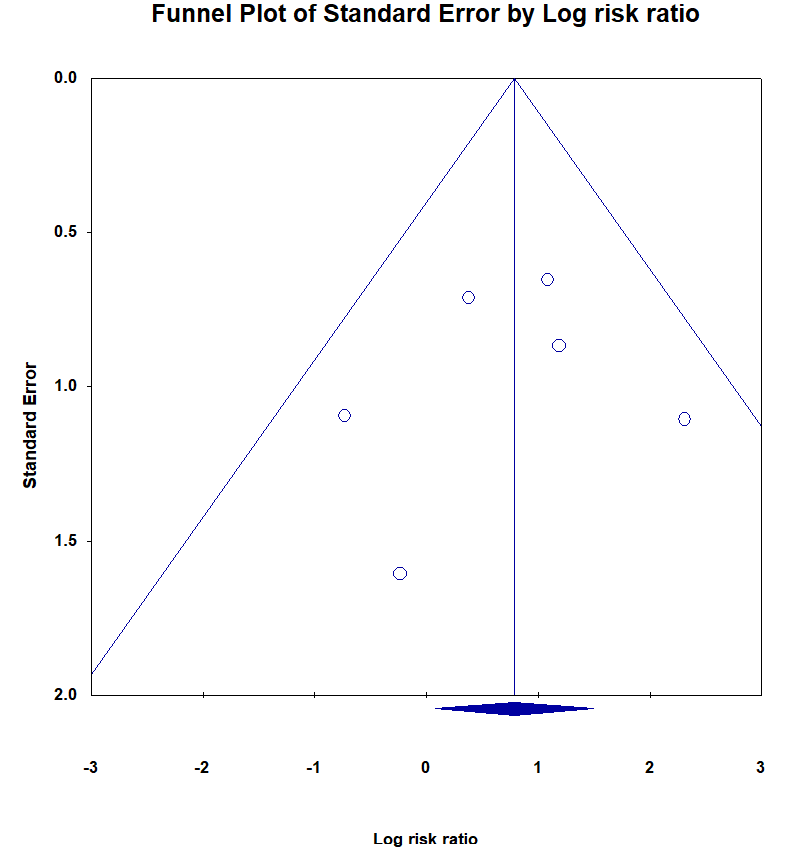
**

**Supplementary Figure 7**: Symptomatic intracerebral hemorrhage funnel plot


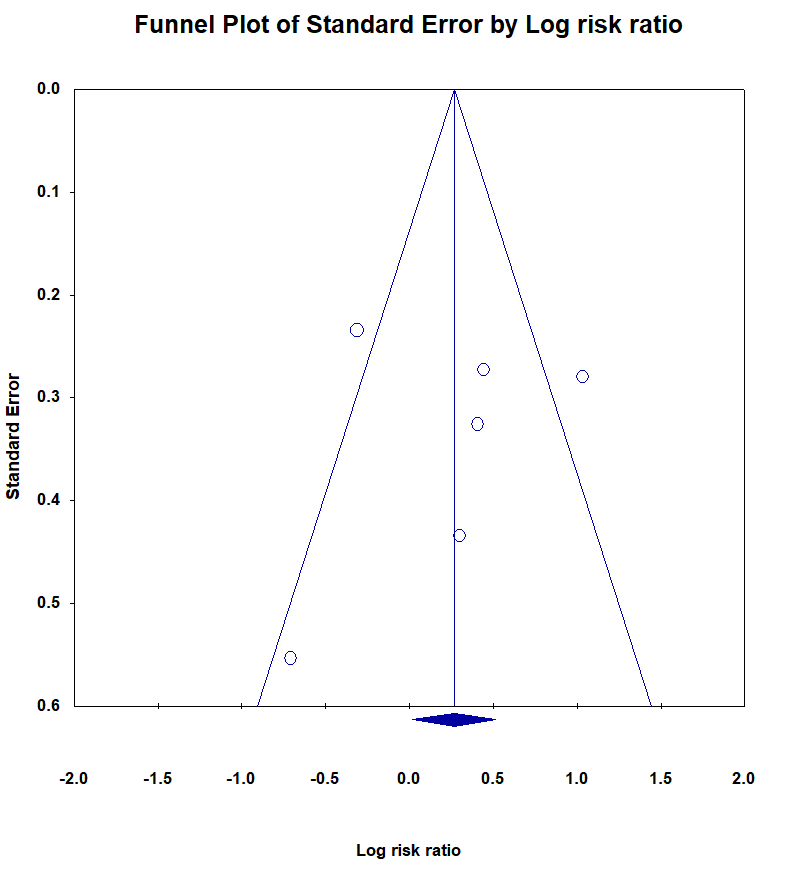


**Supplementary Figure 8**: All-cause mortality funnel plot


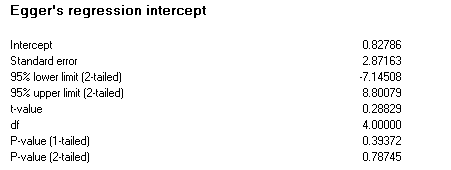


**Supplementary Figure 9:** Functional Independence Egger’s regression test

**
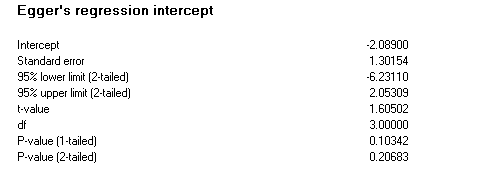
**

**Supplementary Figure 10:** Successful recanalization Egger’s regression test

**
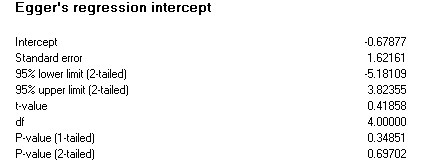
**

**Supplementary Figure 11**: Symptomatic intracerebral hemorrhage Egger’s regression test


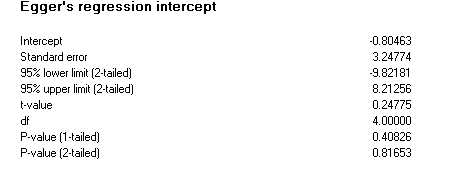


**Supplementary Figure 12**: All-cause mortality Egger’s regression test
